# Supplementary material
Source: HighWire-hosted journal article supplement (https://cmajopen.ca/highwire/filestream/84913/field_highwire_adjunct_files/3/CMAJOpen-2020-0177-1-at.pdf)
Supplement: CMAJOpen-2020-0177-1-at.pdf [file CMAJOpen-2020-0177-1-at.pdf]

**Appendix 1 (as supplied by the authors): Kessler Psychological Distress Scale (K10)**

| <b>Please select the answer that is correct for you:</b>                                          | <b>All of the time (score 5)</b> | <b>Most of the time (score 4)</b> | <b>Some of the time (score 3)</b> | <b>A little of the time (score 2)</b> | <b>None of the time (score 1)</b> |
|---------------------------------------------------------------------------------------------------|----------------------------------|-----------------------------------|-----------------------------------|---------------------------------------|-----------------------------------|
| 1. In the past 4 weeks, about how often did you feel tired out for no good reason?                |                                  |                                   |                                   |                                       |                                   |
| 2. In the past 4 weeks, about how often did you feel nervous?                                     |                                  |                                   |                                   |                                       |                                   |
| 3. In the past 4 weeks, about how often did you feel so nervous that nothing could calm you down? |                                  |                                   |                                   |                                       |                                   |
| 4. In the past 4 weeks, about how often did you feel hopeless?                                    |                                  |                                   |                                   |                                       |                                   |
| 5. In the past 4 weeks, about how often did you feel restless or fidgety?                         |                                  |                                   |                                   |                                       |                                   |
| 6. In the past 4 weeks, about how often did you feel so restless you could not sit still?         |                                  |                                   |                                   |                                       |                                   |
| 7. In the past 4 weeks, about how often did you feel depressed?                                   |                                  |                                   |                                   |                                       |                                   |
| 8. In the past 4 weeks, about how often did you feel that everything was an effort?               |                                  |                                   |                                   |                                       |                                   |
| 9. In the past 4 weeks, about how often did you feel so sad that nothing could cheer you up?      |                                  |                                   |                                   |                                       |                                   |
| 10. In the past 4 weeks, about how often did you feel worthless?                                  |                                  |                                   |                                   |                                       |                                   |

**Source:** Kessler RC, Andrews G, Colpe LJ, Hiripi E, Mroczek DK, Normand SLT et al. Short screening scales to monitor population prevalences and trends in non-specific psychological distress. *Psychol Med* 2002; **32**: 959–76.
